# Supplementary material
Source: PubMed Central journal article supplement (PMC6765396)

**Supplementary Figure S1.** Scanning electron microscopy (SEM) of OC-X 1:7 SD at scale bar 50  $\mu\text{m}$  and magnification 700,000x. Black arrow detects the molecularly dispersion of OC inside the (+)-xylitol matrix.

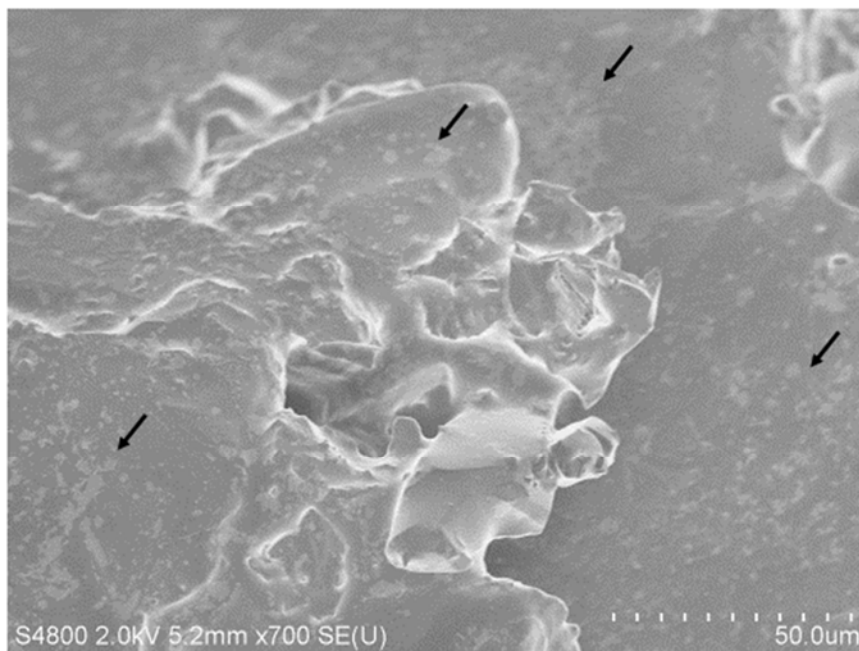

**Supplementary Figure S2.** Representative recurrence experiment wound-stitched mouse after primary tumor surgical excision on day-15 post-inoculation and sample excised primary tumor.

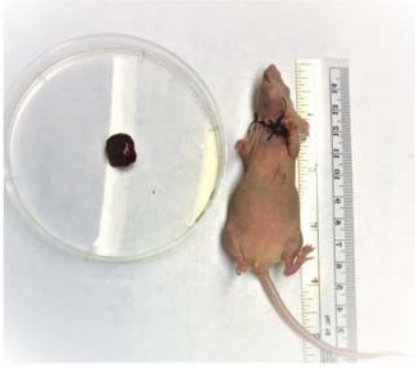

**Supplementary Figure S3.** Mice body weight monitoring over the study course. (A) Growth mode, n=4. (B) Recurrence mode, n=5. (C) Prevention mode, n=5. Points represent the mean of body weight for animals in each group over the experiment duration. Error bars indicate S.E.M.

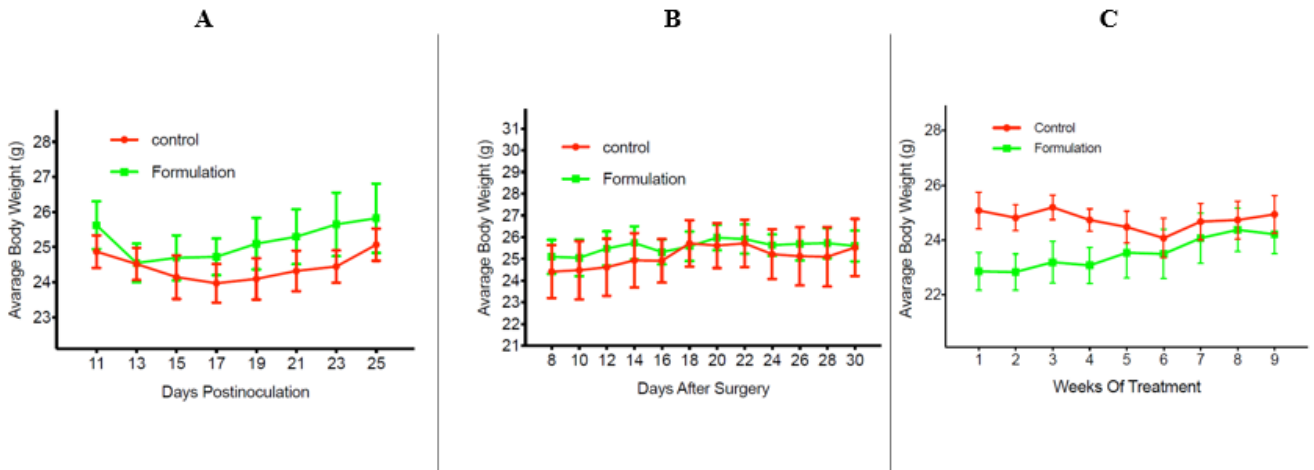

Supplement: NIHMS1538068-supplement-1.pdf [file NIHMS1538068-supplement-1.pdf]
